# Supplementary material for: Impact of Hydroxyapatite on Gelatin/Oxidized Alginate 3D-Printed Cryogel Scaffolds
Source: Preprints.org preprint supplement (doi:10.20944/preprints202406.0572.v1), 2024-06-10
Supplement: Supplementary file 1 [file supplementary]

**Impact of Hydroxyapatite on Gelatin/Oxidized Alginate 3D-Printed Cryogel Scaffolds**

Supporting Information

Ainur Zhanbassynova1, Fariza Mukasheva1, Madi Abilev1, Dmitriy Berillo2, Alexander Trifonov1, and Dana Akilbekova1*

1Department of Chemical and Materials Engineering, School of Engineering and Digital Sciences, Nazarba-yev University, 010000 Astana, Kazakhstan.

2Department of Chemistry and Biochemical Engineering, Satbayev University, 050013 Almaty, Kazakhstan.

*Corresponding author, email: [dana.akilbekova@nu.edu.kz](mailto:dana.akilbekova@nu.edu.kz)

**Keywords:** 3D printing, cryogelation, hydroxyapatite, stem cells, bone tissue engineering.


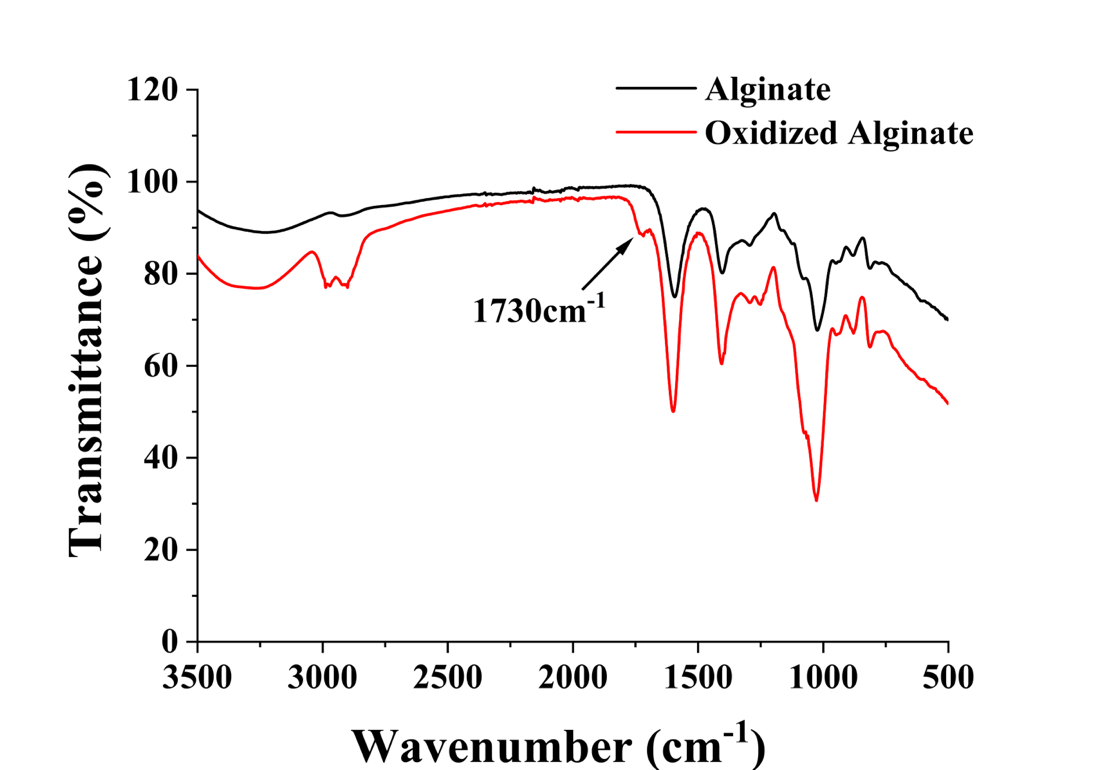


**Figure S1:** FTIR spectra of both oxidized and untreated alginate are shown. The arrow points to the 1730 cm-1 region, which corresponds to the C=O bond stretching in the aldehyde group, signifying the successful synthesis of oxidized alginate.
